# Supplementary material for: Zebrafish Models of Autosomal Dominant Ataxias
Source: Cells. 2021 Feb 17;10(2):421. doi: 10.3390/cells10020421 (PMC7922657; doi:10.3390/cells10020421)
Supplement: Supplementary file 1 [file cells-10-00421-s001.xlsx]

## Sheet: Dominant ataxias
Disease / gene	Zebrafish gene (% homology)	Model	Survival and early development	Morphological phenotype	Neural phenotype	Genetics and proteomics	Behavior	Treatment	Reference
SCA2 / ATXN2	atxn2 (57%)	c9orf72 morpholino and expression of a HA-tagged construction of 30 repeats of atxn2	-	-	Disrupted arborization and shortening of the motor neuron axons	-	Abnormal locomotion with reduced touch-evoked escape response	-	[48]
SCA3 / ATXN3	atxn3 (67%)	Inyection of 80 polyQ repeats mRNA of ATXN3 and knock out of p53	-	-	Apoptosis mainly in CNS that was not present in a p53 knock out model	-	-	-	[50]
		Trangenic model (Gal4 VP16 EGFP flanked by tol2 sites) containing 23 and 84 CAG repeats	Decreased survival of zebrafish with 84 CAG repeats	-	Signs of neuropathology: polyglutamine neuritic beading-staining pattern. atxn3 cleavage fragments	-	Zebrafish with 84 atxn3 repeats swim shorter distances than 23 atxn3 repeats zebrafish	Calpeptin rescued the motor phenotype and decreased levels of atxn3 cleaved fragments but also removed all human ATXN3 protein. Cotreatment with cloroquine prevented the removed of human ATXN 3 protein and improved swimming produced by calpeptin treatment	[51]
		atxn3 splice block morpholino	-	Reduced brain and eye size. Retinal alterations: microtubule disorganization and defective retinal structure formation. Alteration of the outer segment of photoreceptor length and opsin mislocalization	-	-	-	-	[52]
SCA6 / CACNA1A	cacna1aa (72%) and cacna1ab (71%)	Knock out cacna1ab(tm154) and cacna1ab splice block morpholino	-	-	Lack of touch-evoked activation in cacn1aa mutant homozygous cells	-	Progressive loss of touch-evoked motor behaviors in cacna1ab homozygous and morpholino. Intermediate phenotype in cacna1ab heterozygous.	-	[56]
		Knock out cacna1ab (tb204a)	-	-	Reduced calcium trafficking at the neuromuscular junctions	-	Reduced locomotion	Treatment with 3,4-diaminopyridine and roscovitine rescued locomotion and neuromuscular transmission	[57]
		2 cacna1aa translation block morpholinos	Dose dependent mortality	Curved body axis, short body length, reduced head and eye size, pericardial edema, yolk sac malformations, slight hyperpigmentation and lack of swim bladder	-	-	Reduced locomotor activity, behavioural impairment and epileptic-like seizures	Antiseizure drugs: sodium valproate, ethosuximide, lamotrigin and topiramate reduced epileptic like seizures in 4dpf larvae	[60]
SCA7 / ATXN7	atxn7 (45%)	atxn7 translation block and splice block morpholinos	High embryonic lethality, most of them died before 24hpf	Impaired head and tail differentiation	Impaired purkinje and granule cell differentiation. Disorganization of the photoreceptor layer and reduction of the number of photoreceptors	-	-	-	[63]
		atxn7 translation and splice block morpholinos and atxn7 CRISPR Cas9	-	Ocular coloboma and alteration of cornea, iris, ciliary body, lens, choroid, retinal pigment epithelium and optic nerve	Photoreceptor terminal differentiation and optic nerve formation altered through affectation of ganglion cell axon pathfinding and the optic nerve bundling	-	-	-	[64]
SCA13 / KCNC3	kcnc3a (66%) and kcnc3b (67%)	Human KCNC3 mRNA with R420H mutation	-	Normal body length	Suppressed the excitability of Kv3.3 expressing, fast-spiking neurons in zebrafish	-	Reduced startle response	-	[69]
		Expression of infant (F448L) or adult onset (R420H) KCNC3 mutant proteins in motor neurons in the zebrafish spinal cord	-	-	F448L: Frequent pathfinding failure of the caudal primary motor neurons. R420H: No pathfinding mistakes, increase complexity of the distal axonal arbor	-	-	-	[70]
		SCA13 trangenic model with kcnc3a R335H mutant channel (equivalent to KCNC3 R420H variant) with expecific expression in purkinje cells	Died between 4-6 dpf	-	Robust Purkinje cell degeneration	-	Impaired saccade eye movement	-	[71]
		SCA13 trangenic model expressing infant (iR4H) or adult onset (aR3H) KCNC3 mutations in purkinje cells	-	-	iR4H: Hyperexcitability of purkinje cells during cerebellar development that stop process extension, altered dendritic branching and synaptogenesis and caused quickly cell death. aR3H: Latent hypoexcitability. Normal survival and development of purkinje cells	-	-	-	[72]
SCA14 / PRKCG	prkcg (67%)	prkcg translation block morpholino	Hatching failure	-	-	-	Inability to do escape response	Unable of trafficking AMPA-Rs following application of phorbol 12-myristate 13-acetate or PKCc.	[76]
SCA17 / TBP	tbp (85%)	tbp translation block morpholino and injection of a dominant-negative variant of TLF mRNA	tlf model failed to initate epiboly or arrested before dome stage and notail expression pattern was abolished. Tbp model had an Impaired epiboly but normal notail expression	-	-	Both models abolished expression of some endogenous early patterning genes	-	-	[78]
		tbp translation-block morpholino from Müller et al., 2001	-	-	-	17,5% of genes of dome stage showed downregulation and 17,1% upregulation. Most of the genes activated by tbp are dinamically regulated during zebrafish ontogeny. Negative regulatory role of Tbp on the tbp gene promoter. Upregulation of maternally inherited transcrips in morphants	-	-	[79]
SCA37 / DAB1	dab1a (68%) and dab1b: (49%)	Injection of mRNA of the pathological allele insertion (ATTTC)58	Lethality before 24hpf	Developmental malformations	-	-	-	-	[38]
		CRISPR/Cas9 of dab1a and also reelin Talen mutant and vldlr CRISPR/Cas9	-	-	Abnormal retinal ganglion cells laminae targeting and increased arbor thickness. Increased number of periventricular neurons with lamination defects in reelin, dab1a and vldlr mutants.	-	-	-	[81]
		Reelin Talen mutant, dab1a and vldlr CRISPR/Cas9 (Di Donato et al., 2018)	-	-	-	Levels of 5-HT in the hindbrain were seen to be increased in Reelin mutants	Reelin mutant: Selective reduction in their preference for social novelty. Dab1a mutant: hyperactive and more aggressive. Vldlr mutant: more exploratory comportment and less anxious behaviour	Reduction of 5HT levels with buspirone in reelin mutant did not rescue the mutant behaviour	[82]
		Reelin Talen mutant, dab1a and vldlr CRISPR/Cas9 (Di Donato et al., 2018)	-	-	Adult mutant reelin, dab1a and vldlr fish showed atypical purkinje cell positioning in the cerebellum, a high proportion of ectopic purkinje cells with abnormal afferent axonal projections of parallel fibers and climbing fibers in dendrite regions and abnormalities in the cerebellum-like structure in the mesencefalic tectum. Ectopic eurydendroid cells and Bergmann glial cells and aberrant directi…	-	-	-	[83]
Sensory dominat ataxia 1 / RNF170	rnf170 (64%)	rnf170 translation block morpholinos and mutant human RNF170 mRNA injection	Increased death	Developmental abnormalities in rnf170 morphants and in mutant RNF170 mRNA injection	-	-	-	-	[39]
		rnf170 translation block and splice block morpholinos, overexpression of human RNF170 mRNA	-	Microphthalmia, microcephaly in rnf170 morphants. Truncation of the body axis and reduction in eye size in 50% of the embryos injected with human wild type RNF170 mRNA	Reduced neurogenesis and loss of ventricular cavities in rnf170 morphants	-	Loss of mobility at 48hpf	-	[89]
Episodic Ataxia 1/ KCNA1	kcna1a (86%) and kcna1b (83%)	kcna1a translation block morpholinos	-	-	-	-	Increase in basal respiration, total mitochondrial respiration and ATP-linked respiration. Hyperactivity and EEG abnormal activity consistent with seizures	Vorinostat decreased seizures and restored metabolism	[90]
Episodic Ataxia 5/ CACNB4	cacnb4a (87%) and cacanb4b (82%)	cancb4a and cancb4b splice block morpholinos	Yolk syncytial layer abnormal disorganized nucleus at sphere stage. Failure of the epiboly of class I morphant phenotype and retarded epiboly in class II morphant phenotype. These 2 phenotypes died before 24hpf. Class III morphant embryos died at 6dpf	Cardiac defects in class III morphant phenotype	-	-	-	-	[91]
X-fragile and FXTAS / FMR1	fmr1 (70%)	2 fmr1 translation block morpholinos	Incomplete anterior extension of the head at 24hpf. Defects in neural crest specification and defective migration of neural crest cells at 26-somite stage	Expanded brain ventricles and pericardial edema at 48hpf. Shorter and wider Meckels’ cartilage. Reduced level of innervation of the facial region by the cranial nerves	Lack of organization in the brain and morphological changes in the midbrain/hindbrain boundary. 2 fold increased neurite branching in Rohon–Beard neurons. 8-fold increase in rare axon guidance defects. Axon defasciculation of neurons in the placode. Reduction of trigeminal ganglion neurons	Altered pattern of transcription of dlx-2a and fgfr1	-	Treatment with MPEP rescued the branching effects and returns the length and width of Meckels’ cartilage to close to normal	[92]
		2 fmr1 knock out ENU (hu2787 and hu2898)	-	No phenotype	-	-	-	-	[93]
		fmr1 knock out ENU (hu2787)	-	-	Significant reduction in long-term potentiation and enhanced long-term depression in telencephalon	-	Anxiolytic responses and hyperactivity	-	[94]
			-	-	-	-	Reduced neophobic responses, altered explorative behavior or reduced open space aversion	-	[95]
			-	-	Expanded length of the axon arbors of 59% and increased number of branches of 120%. Total synaptic density in the axons of spinal motor neurons increased 53%. Increased arbor length and number of branches in Rohon-Beard sensory neurons of 73% and 92%. Increased synapse density of 30% in glutamatergic neurons	Increased expression of mTor and sash1. Biochemical interaction of of Fmrp and Adar2a proteins. Fmrp protein can bind adar1 mRNA. Overexpression of adar genes. 30% increase in Adar2 expression levels in fmr1 mutant brains. Mild increase in RNA editing Adar target genes levels with synaptic and neuronal functions at 6dpf	Hyperlocomotor activity under light and dark conditions and altered behavioral response to light stimuli at 6dpf	-	[99]
			-	-	-	-	Precocious development in shoaling preference at 28dpf. Elevated anxiety levels	-	[96]
			-	-	-	-	Normal responses to visual motion. Altered auditory responses.	-	[97]
			-	-	Reduced myelin sheaths in mutant oligodendrocytes	Reduced myelin basic protein expression. Equal amounts of myelin mRNA in mutants and wild type embryos	-	-	[100]
		fmr1 CRISPR/Cas9	Impaired craniofacial cartilage development	-	-	Learning and memory related genes were downregulated. Downregulation of cartilage development related genes sox9a and acana	Hyperactivity, learning and memory defects	-	[101]
		fmr1 knock down DNAzyme	-	Craniofacial abnormalities, bent notochord and deformed tail	-	Increased mGluR5 protein	Increased anxiety, impaired cognition and circling behaviour at 7dpf	Early treatment with mavoglurant: reduced anxiety, increased cognition and reduced circling. Early treatment with KU046: reduced anxiety and repetitive behaviour at two doses.	[102]
